# Supplementary material for: A chiral microenvironment promotes retinal progenitor cell proliferation by activating the Akt and ERK pathways
Source: Royal Society of Chemistry journal article supplement (doi:10.1039/d2bm00886f), 2022-01-01
Supplement: d2bm00886f1.pdf [file d2bm00886f1.pdf]

## Supporting Information

### **Chiral microenvironment promotes retinal progenitor cells proliferation by activating the Akt and ERK pathways**

Na Sun,<sup>[a,d]</sup> Jiajing Wang,<sup>[b]</sup> Xiaoqiu Dou,<sup>\*[c]</sup> Yiqi Wang,<sup>[b]</sup> Yuan Yang,<sup>[a]</sup> Dong Xiao,<sup>[a]</sup>  
Peiquan Zhao,<sup>[a]</sup> Jing Li,<sup>[a]</sup> Shuting Wang,<sup>[c]</sup> Ping Gu<sup>\*[b]</sup> and Jing Ji<sup>\*[b]</sup>

*[a] Department of Ophthalmology, Xinhua Hospital, Shanghai Jiao Tong University  
School of Medicine, Shanghai, 200092, China;*

*[b] Department of Ophthalmology, Ninth People's Hospital, Shanghai Jiao Tong  
University School of Medicine, Shanghai, 200011, China;*

*E-mail: guping2009@sjtu.edu.cn, flowerrainday@sina.com*

*[c] State Key Lab of Metal Matrix Composites, School of Materials Science and  
Engineering, Shanghai Jiao tong University, Dongchuan Road 800, Shanghai, 200240,  
China;*

*E-mail: douxiaoqiu@sjtu.edu.cn*

*[d] Shanghai Key Laboratory of Orbital Diseases and Ocular Oncology, Shanghai,  
200011, China.*

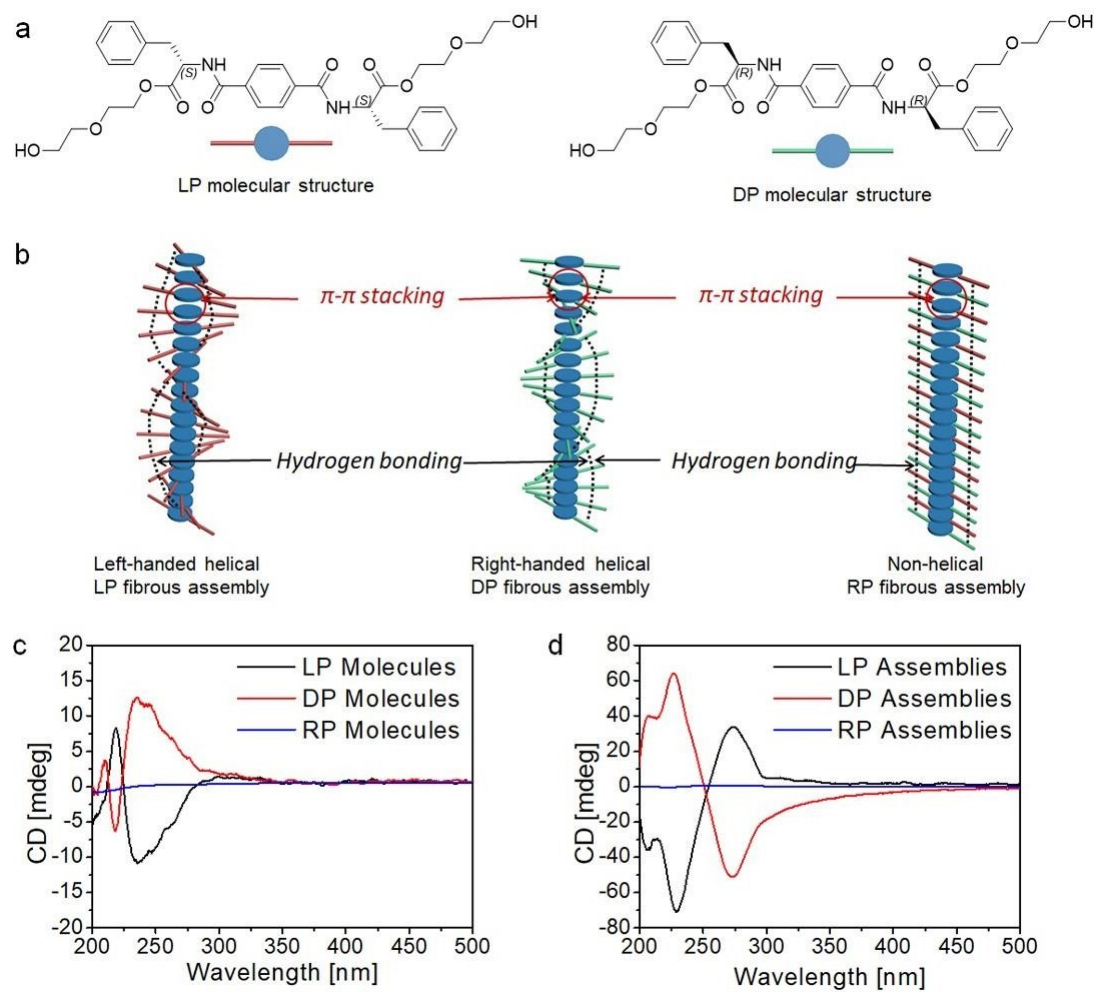

**Figure S1.** (a) The molecular structures of LP and DP. (b) The assembly was driven by  $\pi$  -  $\pi$  stacking and hydrogen bonding interactions. (c) CD spectra of LP, DP, and RP molecules in MeOH. (d) CD spectra of LP, DP, and RP fibrous assemblies.

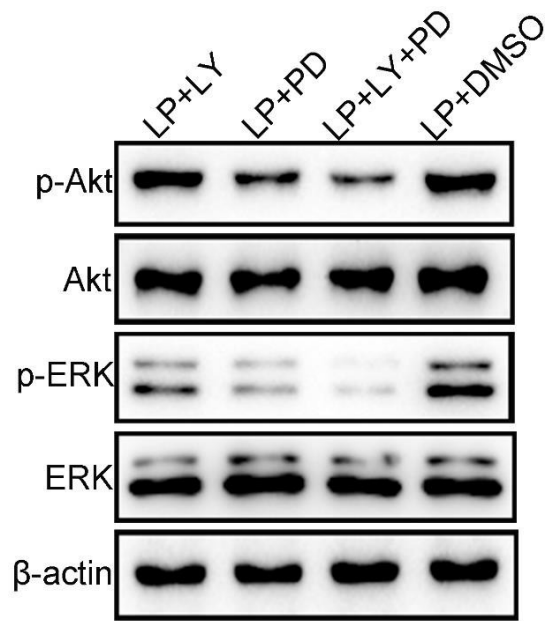

**Figure S2.** L-chiral nanofibrous films regulated RPC proliferation via Akt and ERK signaling pathways. RPCs were cultured with LY294002, PD98059, or LY294002 plus PD98059 in LP-treated group. Western blot assays revealed the temporal changes of phosphorylated (p-Akt, p-ERK) and total proteins.

**Table 1.** Primer pairs for qPCR analysis

| Genes          | Accession number | Forward (5'–3')    | Reverse (5'–3') | Annealing Temperature (°C) |
|----------------|------------------|--------------------|-----------------|----------------------------|
| IL-6           | NM_031168        | aggagtggctaaggac   | ataacgcactag    | 60                         |
|                | .1               | caaga              | gtttgccga       |                            |
| MCP-1          | NM_011333        | acctgctgctactcattc | attccttctgggggt | 60                         |
|                | .3               | acc                | cagca           |                            |
| Annexin A5     | NM_009673        | tgctcaggagttaaga   | taatctcggtaaat  | 60                         |
|                | .2               | ctctgttt           | actttctcgtc     |                            |
| $\beta$ -actin | NM_007393        | agccatgtacgtagcca  | ctctcagctgtggt  | 60                         |
|                |                  | tcc                | ggtgaa          |                            |
| Ki-67          | NM_001081        | cagtactcggaatgcag  | cagtctcagggg    | 60                         |
|                | 117.2            | caa                | ctctgtc         |                            |
| Vimentin       | NM_011701        | tggttgacaccactca   | gctttgggggtgctc | 60                         |
| n              | 4                | aaa                | agttgt          |                            |

**Table 2.** Primary antibodies used for western blot assays

| Antibodies     | Type              | Source    | Dilution |
|----------------|-------------------|-----------|----------|
| $\beta$ -actin | Mouse monoclonal  | Millipore | 1:5000   |
| Vimentin       | Mouse monoclonal  | Millipore | 1:1000   |
| Akt            | Rabbit monoclonal | CST       | 1:1000   |
| Erk1/2         | Rabbit monoclonal | CST       | 1:1000   |
| p-Akt          | Rabbit monoclonal | CST       | 1:1000   |
| p-Erk1/2       | Rabbit monoclonal | CST       | 1:1000   |
